# Supplementary material
Source: PubMed Central journal article supplement (PMC5270510)
Supplement: supp_WNL.0000000000003374_Supplemental_material.pdf [file supp_WNL.0000000000003374_Supplemental_material.pdf]

**Supplementary Table e-1. General characteristics of patients with non-mitochondrial diseases**

|                          | ALS         | Cardio-myopathy | Fibromyalgia | Lymphoma    | mCRC       | Non-agenarians | PBC         | PSC         | SM          |
|--------------------------|-------------|-----------------|--------------|-------------|------------|----------------|-------------|-------------|-------------|
| n                        | 9           | 22              | 32           | 20          | 20         | 30             | 29          | 30          | 14          |
| age [years]              | 52.0 (11.9) | 48.0 (12.2)     | 44.0 (11.2)  | 46.9 (12.5) | 64.2 (7.0) | 89.6 (0.5)     | 52.5 (10.1) | 42.4 (13.6) | 55.1 (12.1) |
| BMI [kg/m <sup>2</sup> ] | 23.6 (2.6)  | 25.9 (4.6)      | 27.0 (5.2)   | na          | 25.5 (4.8) | 25.6 (4.0)     | 23.8 (2.9)* | 22.0 (3.1)* | na          |
| %males (n)               | 55.6 (5)    | 59.1 (13)       | 21.9 (7)     | 55.0 (11)   | 50.0 (10)  | 50.0 (15)      | 27.6 (8)**  | 50.0 (15)   | 50.0 (7)    |
| fasting [h]              | no          | 12              | 8-10         | na          | na         | na             | >2          | >2          | 12          |
| sample storage [°C]      | -20         | -80             | -70          | -70         | -20        | -70            | -80         | -80         | -80         |

Brackets indicate the unit of each variable. Data presented as mean values (SD), na=not available, \*calculated using ascites free weight. \*\*As PBC is predominantly a female disease, we included all males transplanted in Finland between years 2000-2013 with this diagnosis. Abbreviations: ALS, amyotrophic lateral sclerosis; mCRC, metastasized colorectal cancer; PBC, primary biliary cirrhosis; PSC, primary sclerosing cholangitis; SM, statin-induced myalgia

**Supplementary Table e-2. Association of S-FGF21 to liver dysfunction.**

| Spearman r              | Bil        | MELD       | AST        | AFOS       | Alb        | ALT        | GT         | INR        | Prealb     |
|-------------------------|------------|------------|------------|------------|------------|------------|------------|------------|------------|
| r                       | 0,48       | 0,37       | 0,36       | 0,22       | -0,22      | 0,08       | 0,03       | 0,18       | -0,15      |
| 95% confidence interval | 0,25       | 0,12       | 0,04       | -0,01      | -0,48      | -0,15      | -0,24      | -0,09      | -0,43      |
|                         | to<br>0,66 | to<br>0,59 | to<br>0,61 | to<br>0,43 | to<br>0,07 | to<br>0,31 | to<br>0,29 | to<br>0,43 | to<br>0,15 |
| p (two-tailed)          | 0,000      | 0,005      | 0,023      | 0,055      | 0,121      | 0,471      | 0,832      | 0,176      | 0,314      |
| p value summary         | ***        | **         | *          | ns         | ns         | ns         | ns         | ns         | ns         |
| Number of XY Pairs      | 58         | 56         | 40         | 78         | 50         | 78         | 58         | 58         | 47         |

Bil = bilirubin, MELD = model for end-stage liver disease, AST = aspartate

aminotransferase, AFOS = alkaline phosphatase, Alb = albumin, ALT = alanine

aminotransferase, GT = gamma-glutamyl transferase, INR = international normalized

ratio, Prealb = prealbumin, \*p<0.05, \*\*p<0.01, \*\*\*p<0.0001, ns=non-significant.

**Supplementary Figure e-1. Flowchart of patient enrollment for meta-analysis.**

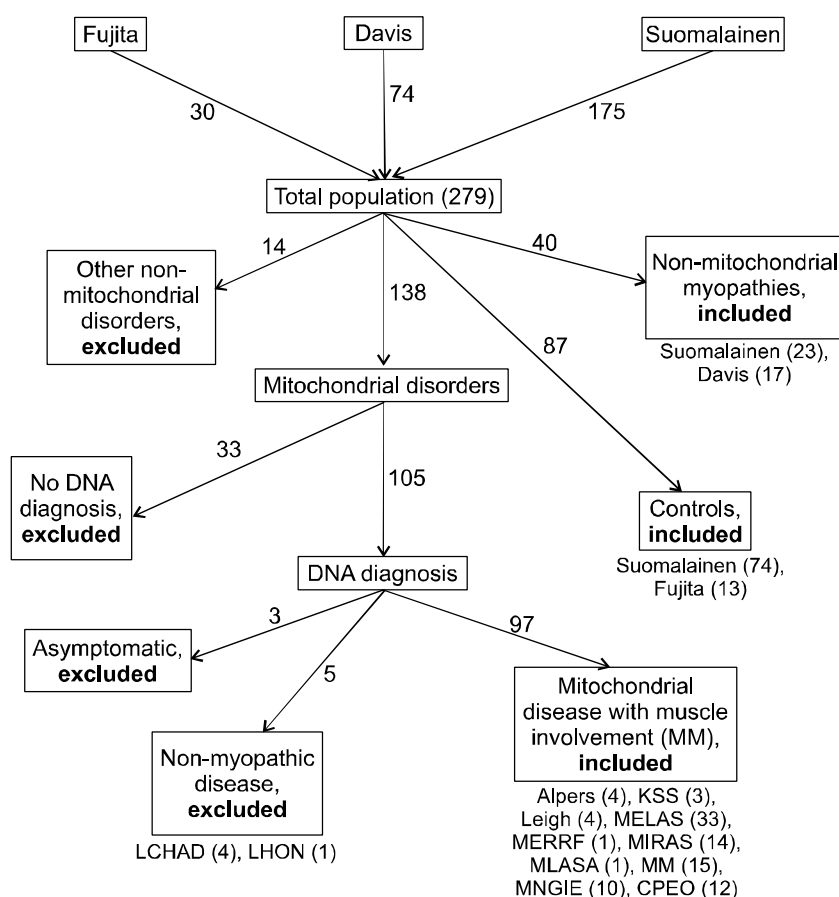

The chart depicts the inclusion criteria of mitochondrial myopathies, non-mitochondrial myopathies and controls collected from literature (Suomalainen et al. *Lancet Neurol* 2011;10:806-818; Davis et al. *Neurology* 2013;81:1819-1826; Fujita et al. *Mitochondrion* 2015;20:34-42 ) and analyzed as new samples. Numbers indicate individuals. Genetic causes of clinical syndromes with muscle manifestation are as follows: Alpers (POLG1), KSS (large mtDNA deletion), Leigh (ND3, SURF1, NDUFS7, ND1), MELAS (32x tRNA<sup>Leu-UUR</sup> 1x tRNA<sup>Lys</sup>, MIRAS (POLG1), MLASA (YARS2), MM (11x tRNA, ND1, POLG, ND5, rRNA), MNGIE (TYMP), CPEO (5x Twinkle, 4x single mtDNA deletion, 2x POLG1, 1x tRNA). LCHAD=long-chain 3-hydroxyacyl-CoA dehydrogenase deficiency, LHON=Leber's hereditary optic neuropathy, KSS=Kearns-Sayre syndrome, MELAS=mitochondrial encephalopathy, lactic acidosis and stroke-like episodes, MERRF=myoclonic epilepsy with ragged-red fibers, MIRAS=mitochondrial recessive ataxia syndrome, MLASA=myopathy with lactic acidosis, MM=mitochondrial myopathy, MNGIE=mitochondrial neurogastrointestinal encephalopathy, CPEO= progressive external opthalmoplegia.

**Supplementary Figure e-2. Association of mtDNA single deletion heteroplasmy-% to S-FGF21 and GDF15.**

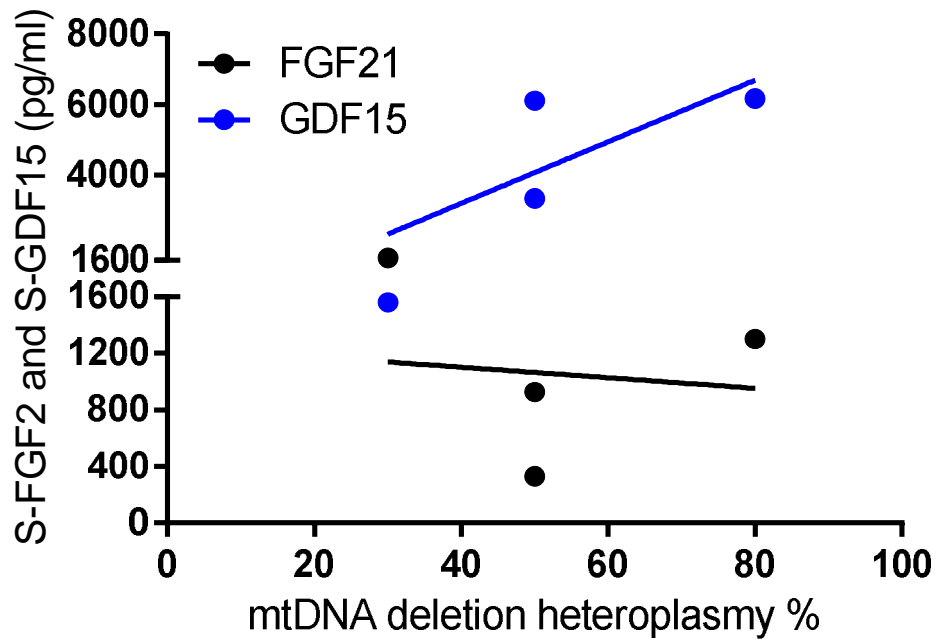

The lines indicate fitted linear regression lines on both datasets.  $R^2$ -value for FGF21 is 0.018 (non-significant) and for GDF15 0.6359 (non-significant).

### Supplementary Figure e-3. Comparison of S-FGF21 to other disease parameters in non-mitochondrial diseases

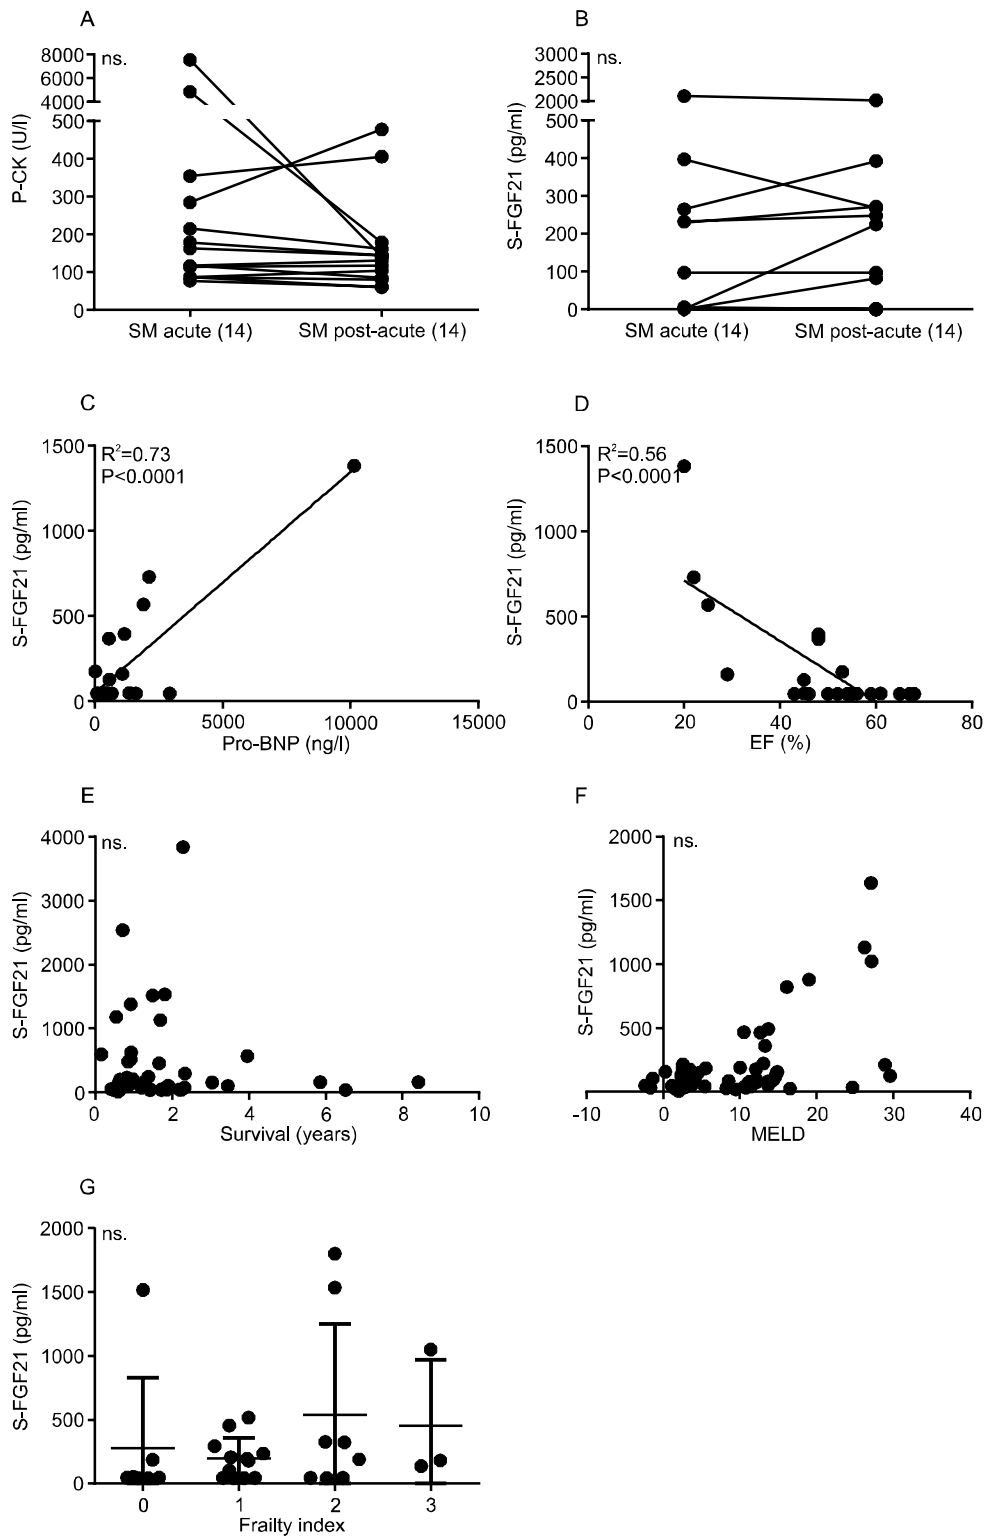

## Supplementary Appendix e-1. Amplification of *Fgf21* in mouse QF

*β-actin* primer sequences:

Forward 5'- ATG CTC CCC GGG CTG TAT- 3'

Reverse 5'- CAT AGG AGT CCT TCT GAC CCA TTC- 3'

*Fgf21* primer sequences:

Forward 5'- CTG GGG GTC TAC CAA GCA TA -3'

Reverse 5'- CAC CCA GGA TTT GAA TGA CC -3'

Amplification protocol:

1. 95°C 3min, 1 cycle
2. 95°C 10sec, 60°C 30sec, 45 cycles
3. 60°C -95°C in 0.5°C intervals, 5sec in each, reading after each temperature change, 1 cycle

## Supplementary references

- e-1. Laaksovirta H, Peuralinna T, Schymick JC, et al. Chromosome 9p21 in amyotrophic lateral sclerosis in Finland: a genome-wide association study. *Lancet Neurol* 2010;9:978-985.
- e-2. Karkkainen S, Helio T, Miettinen R, et al. A novel mutation, Ser143Pro, in the lamin A/C gene is common in Finnish patients with familial dilated cardiomyopathy. *Eur Heart J* 2004;25:885-893.
- e-3. Karkkainen S, Helio T, Miettinen R, et al. A novel mutation, Ser143Pro, in the lamin A/C gene is common in Finnish patients with familial dilated cardiomyopathy. *Eur Heart J* 2004;25:885-893.
- e-4. Holte H, Leppa S, Bjorkholm M, et al. Dose-densified chemoimmunotherapy followed by systemic central nervous system prophylaxis for younger high-risk diffuse large B-cell/follicular grade 3 lymphoma patients: results of a phase II Nordic Lymphoma Group study. *Ann Oncol* 2013;24:1385-1392.
- e-5. Osterlund P, Elomaa I, Virkkunen P, Joensuu H. A phase I study of raltitrexed (Tomudex) combined with capecitabine in metastatic colorectal cancer. *Oncology* 2001;61:113-119.
- e-6. Jylhava J, Nevalainen T, Marttila S, Jylha M, Hervonen A, Hurme M. Characterization of the role of distinct plasma cell-free DNA species in age-associated inflammation and frailty. *Aging Cell* 2013;12:388-397.
- e-7. Aberg F, Rissanen AM, Sintonen H, Roine RP, Hockerstedt K, Isoniemi H. Health-related quality of life and employment status of liver transplant patients. *Liver Transpl* 2009;15:64-72.
- e-8. Nikkanen J, Forsström S, Euro L, et al. Mitochondrial DNA replication defects disturb cellular dNTP pools and remodel one-carbon metabolism. *Cell Metabolism* 2016;23(4):635-48
- e-9. Sato A, Kono T, Nakada K, et al. Gene therapy for progeny of mito-mice carrying pathogenic mtDNA by nuclear transplantation. *Proc Natl Acad Sci U S A* 2005;102:16765-16770.
